# Supplementary material for: A highly effective and versatile technology for the isolation of RNAs from grapevines and other woody perennials for use in virus diagnostics
Source: PubMed Central journal article supplement (PMC4615883; doi:10.1186/s12985-015-0376-3), 2015-10-20
Supplement: 12985_2015_376_MOESM1_ESM.pdf [file 12985_2015_376_MOESM1_ESM.pdf]

Table S1. Primers used in this study for the detection of viruses and plant internal reference genes.

| Target                       | Primer     | Primer sequence (5'-3') | Amplicon size (bp) | Gene                         |
|------------------------------|------------|-------------------------|--------------------|------------------------------|
| <b>GRSPaV</b>                | RSP21      | GAGGATTATAGAGAATGCAC    | 441                | Coat protein                 |
|                              | RSP22      | GCACTCTCATCTGTACTCC     |                    |                              |
|                              | RSP35      | AGRYTTAGRGTRGCTAARGC    | 476                | RNA-dependent RNA polymerase |
|                              | RSP36      | CACATRTCATCVCCYGCAAA    |                    |                              |
|                              | RSP8277F   | AACTGGGCCAAGAAAGGATT    | 160                | Coat protein                 |
|                              | RSP8436R   | CTTGAACCTCAAAAAGAGGCG   |                    |                              |
| <b>GLRaV-2<sup>a</sup></b>   | LR2-9239F  | ATGGTGAARCGYGAYGCTAA    | 292                | RNA-dependent RNA polymerase |
|                              | LR2-9530R  | TCACGAAWGCRTCYTGAGAC    |                    |                              |
| <b>GLRaV-3<sup>b</sup></b>   | LR3-6995F  | GGGRACGGARAAGTGTACC     | 144                | RNA-dependent RNA polymerase |
|                              | LR3-7138R  | TCCAAYTGGGTCATRCACAA    |                    |                              |
| <b>GRBaV</b>                 | GRBaV1097F | ACGAGGAATCGTTTGAATCG    | 235                | Coat protein                 |
|                              | GRBaV1331R | TAAACGTATGTCCACTTGACG   |                    |                              |
| <b>Ubiquitin<sup>c</sup></b> | UBI-F      | CCGCACTCTTGCTGATTACA    | 146                | Internal reference control   |
|                              | UBI-R      | GTGCATAACATTTGCGGCAG    |                    |                              |
| <b>Actin 1<sup>d</sup></b>   | ACT1-F     | TGCTGACAGAAATGAGCAAGG   | 147                | Internal reference control   |
|                              | ACT1-R     | GAGATCCACATCTGCTGGAAG   |                    |                              |

<sup>a</sup> Primers used for the detection of GLRaV-2 were from Alabi et al. [45]. <sup>b</sup> Primers were from Bester et al. [46]. <sup>c</sup> *V. vinifera* gene encoding ubiquitin-60S ribosomal protein L40-2 (UBI) (GenBank accession no. XM\_002273532). <sup>d</sup> *V. vinifera* actin 1 (ACT1) (GenBank accession no. XM\_002282480).

Table S2. Small RNA and miRNA isolated from grapevine leaves.

| <b>Kit</b>     | <b>Small RNA<br/>(<math>\mu\text{g}</math>)</b> | <b>miRNA (ng)</b> | <b>miR 156a<br/>(<math>C_q</math>)</b> | <b>miR 159a<br/>(<math>C_q</math>)</b> |
|----------------|-------------------------------------------------|-------------------|----------------------------------------|----------------------------------------|
| <b>Sigma</b>   | 0.01                                            | 1.67              | 27.60                                  | 21.41                                  |
| <b>Norgen</b>  | 4.15                                            | 142.93            | 22.61                                  | 13.86                                  |
| <b>Bioneer</b> | 1.15                                            | 47.95             | 24.70                                  | 17.40                                  |
| <b>Qiagen</b>  | 0.04                                            | 1.28              | 26.26                                  | 19.91                                  |
| <b>TRIzol®</b> | 0.01                                            | 3.92              | N/A                                    | N/A                                    |
| <b>NTC</b>     |                                                 |                   | N/A                                    | 35.87                                  |

The yields of small RNA and miRNA from the RNA samples isolated from grape young leaves with the five commercial kits were determined by Agilent 2100 Bioanalyzer analysis (also see Fig. 1C) and calculated using the software Bio sizing version B.02.08. SI648 (SR2). The miRNAs 156a and 159a were detected by RT-qPCR with specific primers to each target. The  $C_q$  values were calculated using the threshold cycle method [47]. N/A: no amplification due to the presence of inhibitors; NTC: no template control.
